# Supplementary material for: Modus Operandi of a Pedalo-Type Molecular Switch: Insight from Dynamics and Theoretical Spectroscopy
Source: MDPI journal article supplement (doi:10.3390/molecules28020816), 2023-01-13
Supplement: s1 [file s1]

## Supporting Information

# Modus Operandi of a Pedalo-Type Molecular Switch: Insight from Dynamics and Theoretical Spectroscopy

Mario Taddei <sup>1</sup>, Marco Garavelli <sup>1,\*</sup>, Saeed Amirjalayer <sup>2</sup>, Irene Conti <sup>1,\*</sup> and Artur Nenov <sup>1,\*</sup>

<sup>1</sup> Dipartimento di Chimica Industriale, Università degli Studi di Bologna, 40136 Bologna, Italy

<sup>2</sup> Center for Nanotechnology, Center for Multiscale Theory and Computation, Physikalisches Institut, Westfälische Wilhelms-Universität Münster, 48149 Münster, Germany

\* Correspondence: marco.garavelli@unibo.it (M.G.); irene.conti@unibo.it (I.C.); artur.nenov@unibo.it (A.N.)

### Relaxed scans along the pedalo-type and *trans-cis* coordinates

We calculated energy profiles along the *pedalo*-type and *trans-cis* coordinates. In particular, the former is characterized by the simultaneous torsion around C<sub>2</sub>-N<sub>3</sub> and N<sub>4</sub>-C<sub>5</sub> bonds in which dihedrals N<sub>1</sub>C<sub>2</sub>N<sub>3</sub>N<sub>4</sub> and N<sub>3</sub>N<sub>4</sub>C<sub>5</sub>N<sub>6</sub> rotate in opposite direction. By fixing these dihedrals every 10° between 90° and 180° while optimizing the other structural parameters we obtained the profile of S<sub>0</sub> at the DFT/CAM-B3LYP and MP2 level (Figure S2, bottom left), as well as the profile of S<sub>1</sub> at the SS-CASPT2/SA-2-CASSCF(18,12) level (Figure S2, top left)<sup>1</sup>. With both methods, the ground state energy minimum provides a distorted structure where NCNN and NNCN dihedral angles have values of about 110°, while in the first excited state the geometry with both torsional angle close to the planarity is the energetically preferred one.

Concerning the *trans-cis* reaction coordinate, energy profiles are obtained by fixing the C<sub>2</sub>N<sub>3</sub>N<sub>4</sub>C<sub>5</sub> dihedral every 10° between 180° and 90° while optimizing the other degrees of freedom. The S<sub>0</sub> profile was computed at the DFT/CAM-B3LYP and MP2 level (Figure S2, bottom right), while the S<sub>1</sub> profile at the TD-DFT/CAM-B3LYP and SS-CASPT2/SA-2-CASSCF(18,12) levels (Figure S2, top left). The scan demonstrate that in the ground state the conformation with C<sub>2</sub>N<sub>3</sub>N<sub>4</sub>C<sub>5</sub> dihedral equal to 180° (*trans* configuration) is the energetically preferred one. In the optimization of the first excited state, the energy profile at the SS-CASPT2/SA-2-CASSCF(18,12) level (blue dots in Figure S2, top left) is quite flat, gradually decreasing (by overall 0.2 eV) toward a crossing with the ground state (orange dots in Figure S2, top left) around 110°. At the TDDFT level the crossing occurs earlier along the torsional path, already at 140°, accompanied by a small barrier of ca. 0.15 eV.

---

<sup>1</sup> For the first excited state TDDFT failed to converge toward the crossing region.

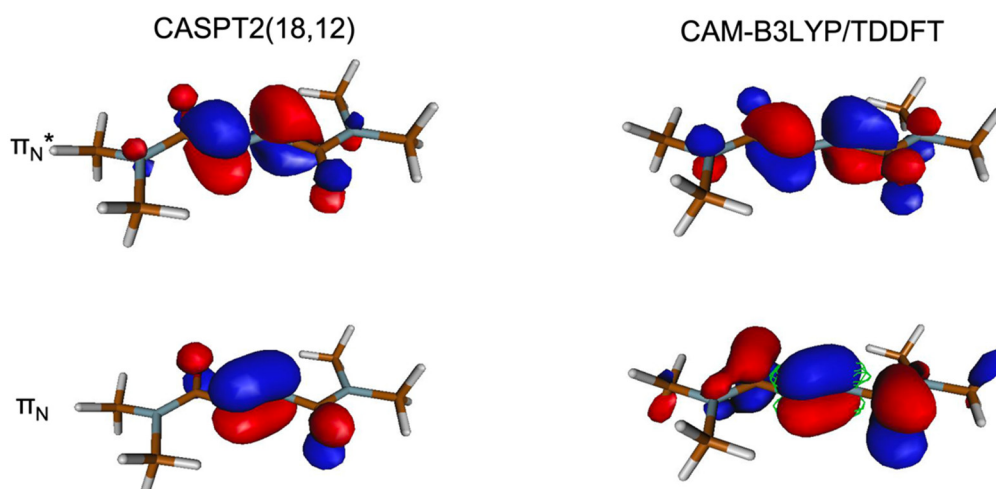

**Figure S1.** Molecular frontier orbitals  $\pi_N$  and  $\pi_N^*$  obtained at a geometry from the  $S_1$  Plateau (see Figure 2 from main text) with  $N_1C_2N_3N_4$ ,  $N_3N_4C_5N_6$  and  $C_2N_3N_4C_5$  exhibiting values close to  $180^\circ$ .

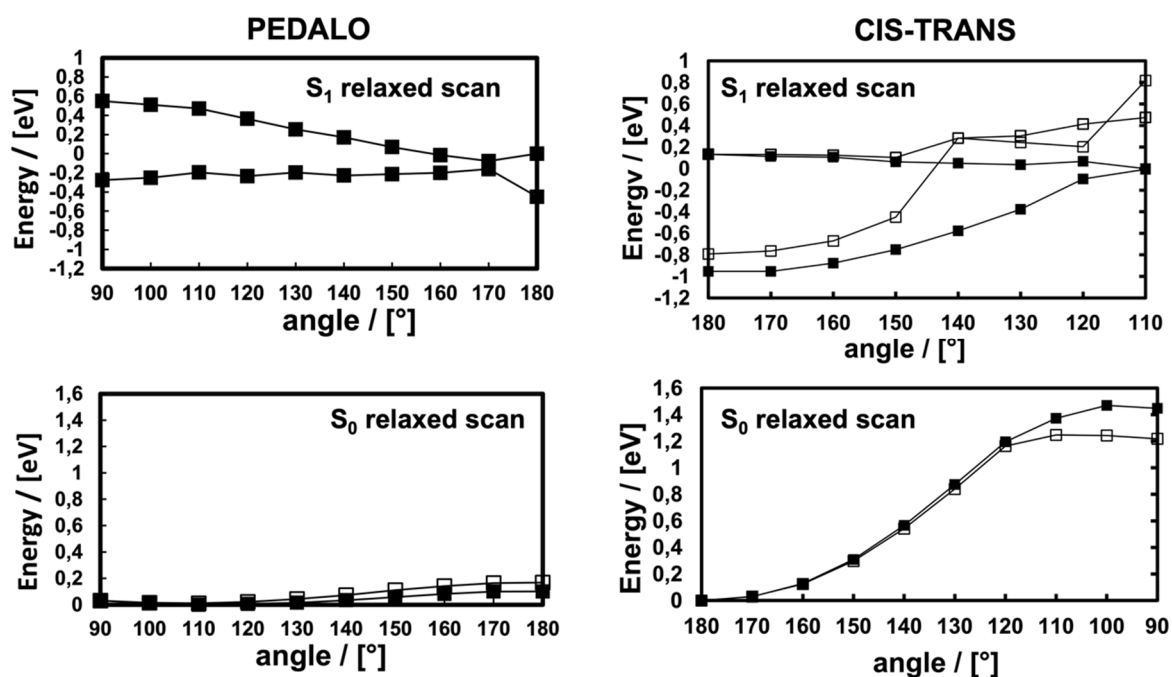

**Figure S2.** left) QM/MM energy profiles along the *pedalo*-type coordinate optimizing either  $S_1$  (top) or  $S_0$  (bottom) at (TD)-DFT/CAM-B3LYP (open squares) and MP2/SS-CASPT2(18,12) (filled squares) level of theory. right) QM/MM energy profiles along the *trans-cis* coordinate optimizing either  $S_1$  (top) or  $S_0$  (bottom) at (TD)-DFT/CAM-B3LYP (open squares) and SS-CASPT2(18,12) (filled squares).

**Table S1.** Energy values of critical points along the minimum energy paths of the *pedalo*-type and *trans-cis* coordinates calculated at CASPT2(18,12) level.

|                | FC   | Plateau S <sub>1</sub> | CI <sub>cis-trans</sub> | CI <sub>plan</sub> |
|----------------|------|------------------------|-------------------------|--------------------|
| S <sub>0</sub> | 0.00 | 0.86                   | 1.73                    | 2.00               |
| S <sub>1</sub> | 2.81 | 1.84                   | 1.73                    | 2.00               |

## Dynamics

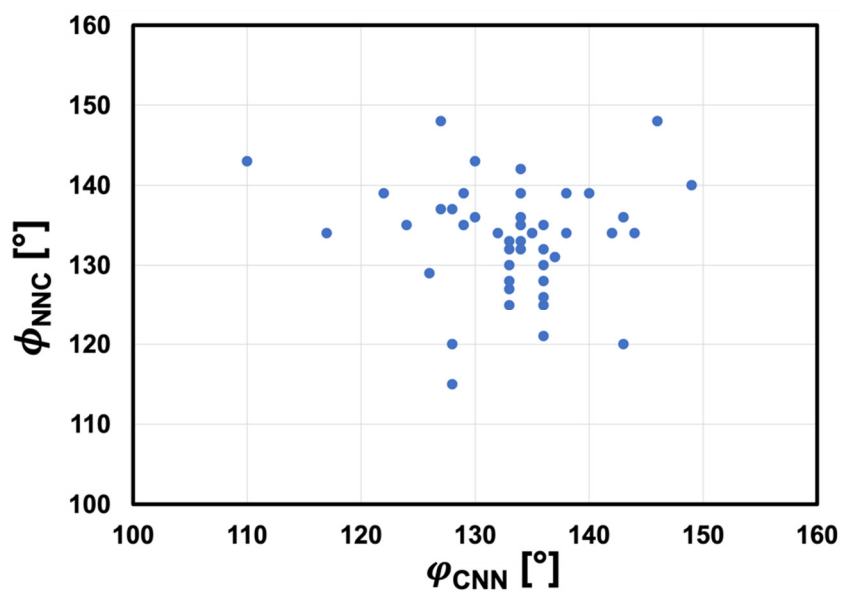

**Figure S3.** Values of the bending angles C<sub>2</sub>N<sub>3</sub>N<sub>4</sub> ( $\phi_{\text{CNN}}$ ) and N<sub>3</sub>N<sub>4</sub>C<sub>5</sub> ( $\phi_{\text{NNC}}$ ) at all S<sub>1</sub>/S<sub>0</sub> hopping geometries along the dynamics.

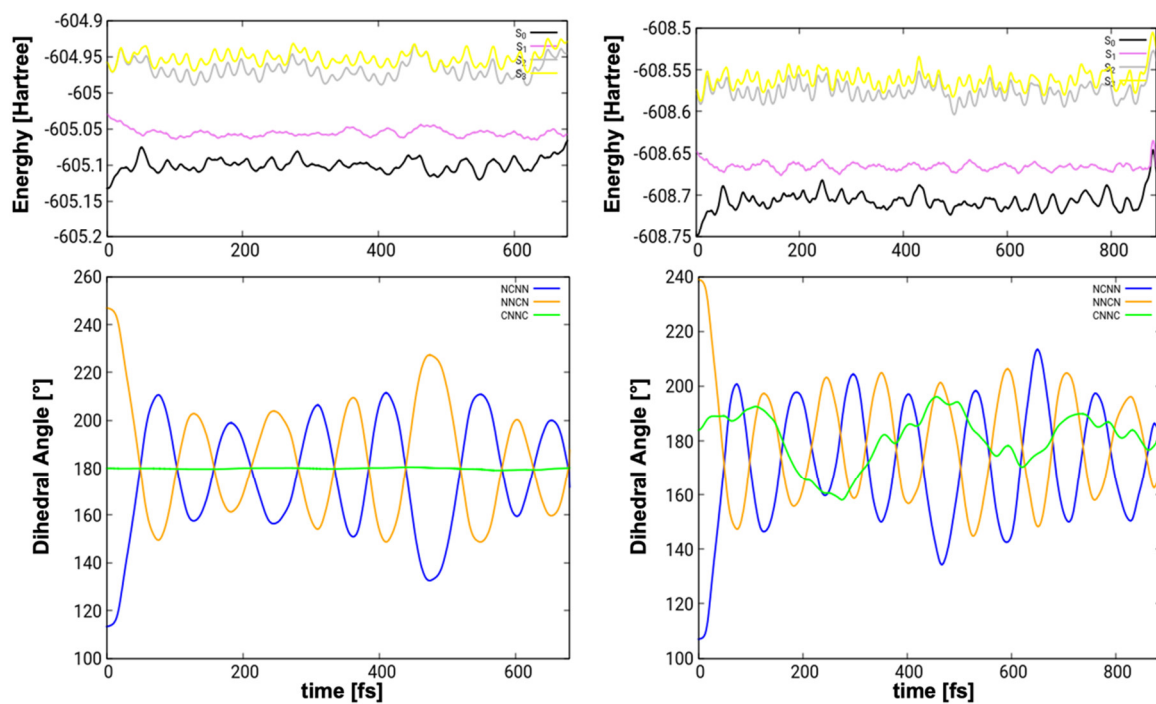

**Figure S4.** 0K trajectories started from S<sub>1</sub> in gas-phase (left) and solvent (right) until the hopping point with S<sub>0</sub>: 679 fs and 888 fs, respectively.

## Spectroscopy

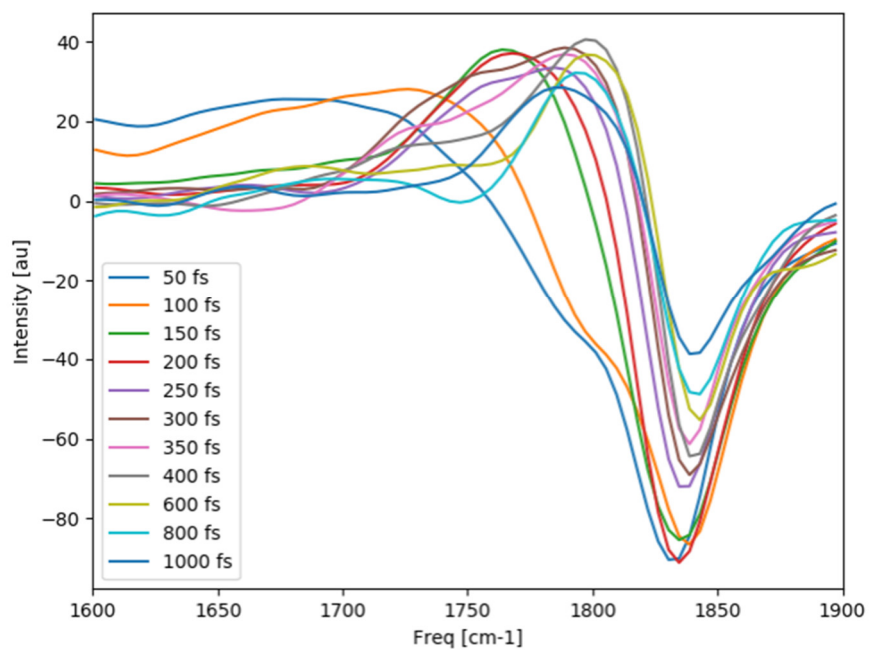

**Figure S5.** Simulated Transient UV pump / IR probe obtained in gas phase at different delay times.

**Cartesian coordinates of all critical points (gas-phase) discussed in the main text**

S<sub>0</sub> minimum (MP2)

|   |           |           |           |
|---|-----------|-----------|-----------|
| O | 23.063202 | 19.100840 | 15.635092 |
| C | 23.277499 | 19.708708 | 16.682717 |
| N | 22.150569 | 20.332940 | 17.372759 |
| N | 21.485107 | 19.448924 | 17.994710 |
| C | 20.357275 | 20.074431 | 18.682195 |
| O | 20.567327 | 20.667420 | 19.739207 |
| N | 24.472424 | 19.973087 | 17.253111 |
| C | 25.680238 | 19.516155 | 16.568412 |
| C | 26.366783 | 18.385502 | 17.323110 |
| C | 27.633221 | 18.573269 | 17.877170 |
| C | 28.250961 | 17.539820 | 18.580039 |
| C | 27.601731 | 16.316278 | 18.730909 |
| C | 26.339091 | 16.122987 | 18.174334 |
| C | 25.724114 | 17.156060 | 17.469906 |
| C | 24.615275 | 20.655158 | 18.542271 |
| C | 25.276158 | 22.018138 | 18.386913 |
| C | 26.583994 | 22.220363 | 18.828074 |
| C | 27.190130 | 23.466409 | 18.676548 |
| C | 26.487636 | 24.514466 | 18.084782 |
| C | 25.179343 | 24.317297 | 17.647101 |
| C | 24.574708 | 23.070849 | 17.799456 |
| N | 19.164959 | 19.828508 | 18.099148 |
| C | 19.025629 | 19.181649 | 16.791879 |
| C | 18.349612 | 17.821979 | 16.905734 |
| C | 17.046854 | 17.642379 | 16.440344 |
| C | 16.427021 | 16.399003 | 16.553797 |
| C | 17.110751 | 15.330861 | 17.131451 |
| C | 18.414081 | 15.505294 | 17.592874 |
| C | 19.032412 | 16.749089 | 17.478579 |
| C | 17.957488 | 20.297205 | 18.776321 |
| C | 17.346424 | 21.503187 | 18.074549 |
| C | 16.122515 | 21.388593 | 17.415061 |
| C | 15.570785 | 22.490972 | 16.764267 |
| C | 16.242197 | 23.712142 | 16.773145 |
| C | 17.463232 | 23.831406 | 17.434117 |
| C | 18.013200 | 22.728367 | 18.084687 |
| H | 25.385007 | 19.175640 | 15.576625 |
| H | 26.361384 | 20.365848 | 16.453248 |
| H | 23.636802 | 20.773262 | 19.003935 |
| H | 25.209741 | 20.019108 | 19.207116 |
| H | 18.442527 | 19.841757 | 16.140414 |
| H | 20.005934 | 19.065144 | 16.333793 |

|   |           |           |           |
|---|-----------|-----------|-----------|
| H | 18.235627 | 20.563064 | 19.795498 |
| H | 16.511110 | 18.472348 | 15.985260 |
| H | 15.410797 | 16.260505 | 16.189165 |
| H | 16.628382 | 14.358971 | 17.219282 |
| H | 18.950026 | 14.670642 | 18.041205 |
| H | 20.051382 | 16.881595 | 17.838618 |
| H | 17.237250 | 19.473821 | 18.818257 |
| H | 23.551934 | 22.920340 | 17.457737 |
| H | 24.628847 | 25.136267 | 17.187634 |
| H | 26.959323 | 25.488438 | 17.967215 |
| H | 28.210290 | 23.622650 | 19.022460 |
| H | 27.134346 | 21.405907 | 19.293835 |
| H | 28.143142 | 19.527068 | 17.761420 |
| H | 29.239494 | 17.687600 | 19.011081 |
| H | 28.082728 | 15.508953 | 19.280314 |
| H | 25.833025 | 15.166077 | 18.288907 |
| H | 24.736981 | 17.002655 | 17.036381 |
| H | 18.967611 | 22.824271 | 18.600313 |
| H | 17.987688 | 24.785208 | 17.443186 |
| H | 15.812133 | 24.573863 | 16.265755 |
| H | 14.615399 | 22.399732 | 16.250690 |
| H | 15.593838 | 20.438152 | 17.408074 |

S<sub>0</sub> minimum (DFT/CAM-B3LYP)

|   |           |           |           |
|---|-----------|-----------|-----------|
| O | 23.017651 | 19.060251 | 15.893107 |
| C | 23.302241 | 19.745865 | 16.856925 |
| N | 22.234251 | 20.427515 | 17.572156 |
| N | 21.539162 | 19.639232 | 18.222340 |
| C | 20.472081 | 20.320814 | 18.938959 |
| O | 20.758488 | 21.008097 | 19.901055 |
| N | 24.537032 | 20.045430 | 17.302432 |
| C | 25.680238 | 19.516155 | 16.568412 |
| C | 26.366783 | 18.385502 | 17.323110 |
| C | 27.633889 | 18.572673 | 17.875842 |
| C | 28.250961 | 17.539820 | 18.580039 |
| C | 27.601731 | 16.316278 | 18.730909 |
| C | 26.338064 | 16.123859 | 18.176137 |
| C | 25.722640 | 17.157320 | 17.472494 |
| C | 24.781057 | 20.815864 | 18.519716 |
| C | 25.460773 | 22.145797 | 18.221310 |
| C | 26.790108 | 22.355786 | 18.588391 |
| C | 27.411753 | 23.571051 | 18.306006 |
| C | 26.703361 | 24.580793 | 17.657381 |
| C | 25.373643 | 24.376443 | 17.293899 |
| C | 24.753536 | 23.160851 | 17.577166 |
| N | 19.236429 | 20.019163 | 18.497187 |
| C | 18.990229 | 19.246143 | 17.282022 |
| C | 18.311557 | 17.916629 | 17.584564 |
| C | 16.980596 | 17.706639 | 17.223433 |

|   |           |           |           |
|---|-----------|-----------|-----------|
| C | 16.359868 | 16.491825 | 17.509740 |
| C | 17.070795 | 15.482580 | 18.156376 |
| C | 18.402101 | 15.686984 | 18.513986 |
| C | 19.021293 | 16.902125 | 18.226800 |
| C | 18.094512 | 20.546314 | 19.234698 |
| C | 17.395532 | 21.667435 | 18.476231 |
| C | 16.118944 | 21.471962 | 17.948878 |
| C | 15.486510 | 22.495949 | 17.245567 |
| C | 16.129758 | 23.719642 | 17.069588 |
| C | 17.403376 | 23.920008 | 17.598537 |
| C | 18.034097 | 22.895273 | 18.301772 |
| H | 25.315035 | 19.151060 | 15.609138 |
| H | 26.388676 | 20.329475 | 16.376041 |
| H | 23.837554 | 20.999023 | 19.032154 |
| H | 25.400533 | 20.218891 | 19.199134 |
| H | 18.369158 | 19.841383 | 16.602541 |
| H | 19.932888 | 19.062287 | 16.768255 |
| H | 18.463673 | 20.920708 | 20.188830 |
| H | 16.423563 | 18.490155 | 16.714706 |
| H | 15.321569 | 16.329429 | 17.226232 |
| H | 16.587615 | 14.532921 | 18.379165 |
| H | 18.959111 | 14.897916 | 19.015967 |
| H | 20.062114 | 17.058401 | 18.505688 |
| H | 17.392565 | 19.729869 | 19.437607 |
| H | 23.713927 | 23.004694 | 17.293750 |
| H | 24.818564 | 25.165916 | 16.790419 |
| H | 27.187251 | 25.530802 | 17.437655 |
| H | 28.448780 | 23.733418 | 18.594141 |
| H | 27.345147 | 21.571979 | 19.098797 |
| H | 28.144740 | 19.525538 | 17.757936 |
| H | 29.239796 | 17.687356 | 19.010414 |
| H | 28.082831 | 15.508796 | 19.279948 |
| H | 25.831397 | 15.167401 | 18.291648 |
| H | 24.734644 | 17.004926 | 17.040518 |
| H | 19.029135 | 23.054575 | 18.714639 |
| H | 17.905687 | 24.876244 | 17.463758 |
| H | 15.636592 | 24.520338 | 16.521313 |
| H | 14.490064 | 22.341723 | 16.835568 |
| H | 15.612062 | 20.519650 | 18.086917 |

S<sub>1</sub> plateau (CASPT2(18,12)/SA-2-CASSCF)

|   |           |           |           |
|---|-----------|-----------|-----------|
| O | 23.183147 | 18.868841 | 16.000594 |
| C | 23.426704 | 19.585821 | 16.974627 |
| N | 22.414324 | 20.001778 | 17.875348 |
| N | 21.192869 | 19.698644 | 17.743935 |
| C | 20.139032 | 20.192100 | 18.546374 |
| O | 20.341422 | 20.903500 | 19.533664 |
| N | 24.646880 | 20.085684 | 17.326506 |
| C | 25.812827 | 19.588020 | 16.592841 |

|   |           |           |           |
|---|-----------|-----------|-----------|
| C | 26.466968 | 18.417077 | 17.317646 |
| C | 27.716646 | 18.568171 | 17.920182 |
| C | 28.307092 | 17.497992 | 18.591870 |
| C | 27.641853 | 16.273140 | 18.670132 |
| C | 26.397882 | 16.117762 | 18.058957 |
| C | 25.814714 | 17.185767 | 17.380967 |
| C | 24.872006 | 20.772873 | 18.597658 |
| C | 25.542769 | 22.125286 | 18.398960 |
| C | 26.858445 | 22.325339 | 18.816853 |
| C | 27.466403 | 23.568295 | 18.648684 |
| C | 26.757657 | 24.616115 | 18.064036 |
| C | 25.442792 | 24.420336 | 17.645757 |
| C | 24.836657 | 23.176471 | 17.814155 |
| N | 18.926515 | 19.750881 | 18.100650 |
| C | 18.761504 | 19.120034 | 16.791745 |
| C | 18.087329 | 17.757634 | 16.887591 |
| C | 16.790920 | 17.580550 | 16.403801 |
| C | 16.189316 | 16.324014 | 16.449449 |
| C | 16.885908 | 15.237996 | 16.975616 |
| C | 18.181833 | 15.409587 | 17.458569 |
| C | 18.781093 | 16.667726 | 17.413977 |
| C | 17.741384 | 20.277825 | 18.775217 |
| C | 17.187205 | 21.511500 | 18.070384 |
| C | 16.060507 | 21.406525 | 17.254641 |
| C | 15.573843 | 22.525575 | 16.581087 |
| C | 16.210666 | 23.756526 | 16.726185 |
| C | 17.330585 | 23.868790 | 17.547583 |
| C | 17.816190 | 22.748374 | 18.219286 |
| H | 25.479201 | 19.281264 | 15.601661 |
| H | 26.521306 | 20.413762 | 16.478821 |
| H | 23.909861 | 20.914955 | 19.091717 |
| H | 25.482991 | 20.138598 | 19.251498 |
| H | 18.180796 | 19.785769 | 16.141862 |
| H | 19.746454 | 19.004015 | 16.337420 |
| H | 18.023633 | 20.529125 | 19.796789 |
| H | 16.249802 | 18.420566 | 15.975454 |
| H | 15.180073 | 16.188096 | 16.064992 |
| H | 16.420540 | 14.254214 | 17.003070 |
| H | 18.728946 | 14.559635 | 17.862648 |
| H | 19.797748 | 16.795707 | 17.781181 |
| H | 16.985668 | 19.487988 | 18.811473 |
| H | 23.808170 | 23.027156 | 17.490561 |
| H | 24.888008 | 25.239239 | 17.191272 |
| H | 27.229668 | 25.588826 | 17.937299 |
| H | 28.492097 | 23.722944 | 18.978569 |
| H | 27.412023 | 21.512589 | 19.281464 |
| H | 28.232960 | 19.524546 | 17.868883 |
| H | 29.280778 | 17.617968 | 19.060991 |
| H | 28.095805 | 15.434752 | 19.193119 |
| H | 25.877634 | 15.163144 | 18.107916 |



|   |           |           |           |
|---|-----------|-----------|-----------|
| H | 24.844475 | 17.056109 | 16.903614 |
| H | 18.692830 | 22.841809 | 18.858204 |
| H | 17.827858 | 24.830130 | 17.664053 |
| H | 15.832436 | 24.631116 | 16.200107 |
| H | 14.697477 | 22.438697 | 15.941527 |
| H | 15.560488 | 20.448224 | 17.138978 |

S<sub>1</sub> plateau (TDDFT/CAM-B3LYP)

|   |           |           |           |
|---|-----------|-----------|-----------|
| O | 23.052166 | 19.050256 | 15.841648 |
| C | 23.293558 | 19.732768 | 16.824487 |
| N | 22.266622 | 20.322801 | 17.585310 |
| N | 21.045367 | 20.223978 | 17.381844 |
| C | 20.017832 | 20.752094 | 18.186066 |
| O | 20.257935 | 21.355033 | 19.219972 |
| N | 24.531444 | 20.036091 | 17.295818 |
| C | 25.680238 | 19.516155 | 16.568412 |
| C | 26.366783 | 18.385502 | 17.323110 |
| C | 27.633582 | 18.572847 | 17.876496 |
| C | 28.250961 | 17.539820 | 18.580039 |
| C | 27.601731 | 16.316278 | 18.730909 |
| C | 26.339383 | 16.122812 | 18.173574 |
| C | 25.724325 | 17.156039 | 17.469268 |
| C | 24.762313 | 20.788277 | 18.521490 |
| C | 25.369859 | 22.157888 | 18.245697 |
| C | 26.716608 | 22.399412 | 18.517554 |
| C | 27.271268 | 23.651363 | 18.256506 |
| C | 26.478042 | 24.666743 | 17.725530 |
| C | 25.130608 | 24.431279 | 17.459027 |
| C | 24.577889 | 23.178823 | 17.720561 |
| N | 18.780876 | 20.505934 | 17.680615 |
| C | 18.551490 | 19.895585 | 16.378369 |
| C | 17.965507 | 18.494300 | 16.497129 |
| C | 16.615528 | 18.268781 | 16.227442 |
| C | 16.081700 | 16.986359 | 16.344201 |
| C | 16.899111 | 15.924704 | 16.727442 |
| C | 18.249879 | 16.144756 | 16.990181 |
| C | 18.781701 | 17.427712 | 16.873352 |
| C | 17.631852 | 20.940331 | 18.461348 |
| C | 16.978741 | 22.186513 | 17.876001 |
| C | 15.734265 | 22.103319 | 17.251175 |
| C | 15.143974 | 23.243971 | 16.709264 |
| C | 15.796812 | 24.472302 | 16.793516 |
| C | 17.037738 | 24.560338 | 17.421456 |
| C | 17.626416 | 23.418859 | 17.962709 |
| H | 25.326075 | 19.154344 | 15.603931 |
| H | 26.387800 | 20.332927 | 16.385078 |
| H | 23.815070 | 20.909398 | 19.048340 |
| H | 25.422768 | 20.207909 | 19.176709 |
| H | 17.878620 | 20.538613 | 15.798593 |

|   |           |           |           |
|---|-----------|-----------|-----------|
| H | 19.496513 | 19.848999 | 15.836046 |
| H | 17.977605 | 21.148314 | 19.473292 |
| H | 15.975768 | 19.093600 | 15.922897 |
| H | 15.028142 | 16.812560 | 16.133217 |
| H | 16.484078 | 14.922402 | 16.816887 |
| H | 18.890677 | 15.315190 | 17.283390 |
| H | 19.838754 | 17.595583 | 17.072594 |
| H | 16.906163 | 20.120830 | 18.513029 |
| H | 23.523905 | 22.999062 | 17.516408 |
| H | 24.508995 | 25.225334 | 17.049332 |
| H | 26.909454 | 25.645380 | 17.522965 |
| H | 28.322200 | 23.837771 | 18.469834 |
| H | 27.337383 | 21.611126 | 18.936778 |
| H | 28.144120 | 19.525961 | 17.759822 |
| H | 29.239378 | 17.687733 | 19.011273 |
| H | 28.082732 | 15.508970 | 19.280308 |
| H | 25.833911 | 15.165480 | 18.287099 |
| H | 24.738201 | 17.002280 | 17.033658 |
| H | 18.595118 | 23.490803 | 18.455013 |
| H | 17.546922 | 25.519902 | 17.490996 |
| H | 15.336319 | 25.363934 | 16.371768 |
| H | 14.172759 | 23.176861 | 16.222400 |
| H | 15.219344 | 21.147695 | 17.186663 |

CI<sub>cis-trans</sub> (CASPT2(18,12)/SA-2-CASSCF)

|   |           |           |           |
|---|-----------|-----------|-----------|
| O | 23.094575 | 19.149602 | 16.178877 |
| C | 23.467187 | 19.912068 | 17.071132 |
| N | 22.538799 | 20.600920 | 17.916399 |
| N | 21.289297 | 20.513922 | 17.800322 |
| C | 20.458045 | 21.606682 | 17.389829 |
| O | 20.921772 | 22.719404 | 17.133565 |
| N | 24.755182 | 20.198518 | 17.395222 |
| C | 25.812827 | 19.588020 | 16.592841 |
| C | 26.466968 | 18.417077 | 17.317646 |
| C | 27.719485 | 18.566192 | 17.914612 |
| C | 28.307092 | 17.497992 | 18.591870 |
| C | 27.641853 | 16.273140 | 18.670132 |
| C | 26.393097 | 16.119696 | 18.071824 |
| C | 25.807899 | 17.189827 | 17.397323 |
| C | 25.133795 | 21.111972 | 18.467566 |
| C | 25.620502 | 22.452525 | 17.931201 |
| C | 26.979277 | 22.768361 | 17.959817 |
| C | 27.426562 | 23.991702 | 17.463045 |
| C | 26.514292 | 24.904699 | 16.937496 |
| C | 25.155995 | 24.594884 | 16.910852 |
| C | 24.710681 | 23.371708 | 17.407944 |
| N | 19.143138 | 21.261879 | 17.364630 |
| C | 18.667250 | 19.890675 | 17.523437 |
| C | 17.793414 | 19.734204 | 18.761484 |

|   |           |           |           |
|---|-----------|-----------|-----------|
| C | 16.438678 | 19.427500 | 18.631850 |
| C | 15.637809 | 19.295461 | 19.765166 |
| C | 16.191257 | 19.468522 | 21.032374 |
| C | 17.544969 | 19.771083 | 21.166228 |
| C | 18.344279 | 19.902246 | 20.032009 |
| C | 18.175157 | 22.289435 | 16.988580 |
| C | 17.709853 | 22.138382 | 15.545293 |
| C | 16.425849 | 21.669451 | 15.266213 |
| C | 16.003281 | 21.524765 | 13.945698 |
| C | 16.864976 | 21.850313 | 12.899929 |
| C | 18.147172 | 22.322084 | 13.174629 |
| C | 18.567577 | 22.466962 | 14.495529 |
| H | 25.368714 | 19.244810 | 15.659457 |
| H | 26.558724 | 20.352078 | 16.353464 |
| H | 24.274742 | 21.264915 | 19.120155 |
| H | 25.917045 | 20.633153 | 19.065309 |
| H | 18.106700 | 19.607964 | 16.624813 |
| H | 19.527498 | 19.225621 | 17.592016 |
| H | 18.649131 | 23.260268 | 17.125690 |
| H | 16.003207 | 19.289301 | 17.644789 |
| H | 14.581099 | 19.055769 | 19.661505 |
| H | 15.566841 | 19.365560 | 21.918051 |
| H | 17.978264 | 19.905102 | 22.155711 |
| H | 19.401011 | 20.139647 | 20.139506 |
| H | 17.321414 | 22.224902 | 17.670735 |
| H | 23.647642 | 23.138577 | 17.384213 |
| H | 24.440272 | 25.306455 | 16.502679 |
| H | 26.861422 | 25.860397 | 16.549065 |
| H | 28.487111 | 24.235268 | 17.485970 |
| H | 27.694922 | 22.059874 | 18.370172 |
| H | 28.241127 | 19.518285 | 17.853912 |
| H | 29.283734 | 17.617526 | 19.057491 |
| H | 28.099259 | 15.437715 | 19.197345 |
| H | 25.873919 | 15.164852 | 18.131448 |
| H | 24.830664 | 17.067033 | 16.933584 |
| H | 19.570048 | 22.835580 | 14.706613 |
| H | 18.821099 | 22.577044 | 12.358734 |
| H | 16.536694 | 21.737541 | 11.868252 |
| H | 15.001010 | 21.159042 | 13.730349 |
| H | 15.749858 | 21.416387 | 16.079654 |

CI<sub>plan</sub>(CASPT2(18,12)/SA-2-CASSCF)

|   |           |           |           |
|---|-----------|-----------|-----------|
| O | 23.033614 | 19.210868 | 16.166259 |
| C | 23.452948 | 19.956769 | 17.056025 |
| N | 22.569820 | 20.651617 | 17.877939 |
| N | 21.317686 | 20.774150 | 17.963152 |
| C | 20.459457 | 21.712840 | 18.522771 |
| O | 20.914443 | 22.672562 | 19.153835 |
| N | 24.752585 | 20.200036 | 17.385799 |

|   |           |           |           |
|---|-----------|-----------|-----------|
| C | 25.812827 | 19.588020 | 16.592841 |
| C | 26.466968 | 18.417077 | 17.317646 |
| C | 27.726123 | 18.561546 | 17.901875 |
| C | 28.307092 | 17.497992 | 18.591870 |
| C | 27.641853 | 16.273140 | 18.670132 |
| C | 26.385018 | 16.125251 | 18.086676 |
| C | 25.796611 | 17.197785 | 17.418531 |
| C | 25.116743 | 21.044631 | 18.515358 |
| C | 25.593936 | 22.424523 | 18.077932 |
| C | 26.958324 | 22.692373 | 17.962557 |
| C | 27.395290 | 23.953968 | 17.561911 |
| C | 26.467256 | 24.954256 | 17.279396 |
| C | 25.103805 | 24.693578 | 17.400421 |
| C | 24.668586 | 23.431491 | 17.800541 |
| N | 19.145193 | 21.417130 | 18.318127 |
| C | 18.720335 | 20.290311 | 17.500557 |
| C | 18.089093 | 19.184349 | 18.336913 |
| C | 16.705535 | 19.005503 | 18.337083 |
| C | 16.128399 | 17.996112 | 19.105948 |
| C | 16.935202 | 17.160452 | 19.875776 |
| C | 18.317991 | 17.332897 | 19.874995 |
| C | 18.893317 | 18.342584 | 19.105518 |
| C | 18.138937 | 22.304845 | 18.889305 |
| C | 17.512673 | 23.209365 | 17.835152 |
| C | 16.202237 | 22.992247 | 17.408759 |
| C | 15.634363 | 23.816725 | 16.438665 |
| C | 16.376271 | 24.862964 | 15.893630 |
| C | 17.684144 | 25.085819 | 16.320000 |
| C | 18.250122 | 24.260554 | 17.290180 |
| H | 25.385349 | 19.250238 | 15.649307 |
| H | 26.557396 | 20.359036 | 16.368998 |
| H | 24.248992 | 21.144365 | 19.173558 |
| H | 25.898149 | 20.537706 | 19.090951 |
| H | 18.011286 | 20.648345 | 16.746248 |
| H | 19.587974 | 19.898316 | 16.961829 |
| H | 18.625042 | 22.908661 | 19.654900 |
| H | 16.072666 | 19.653068 | 17.734960 |
| H | 15.048661 | 17.858648 | 19.104274 |
| H | 16.485893 | 16.371425 | 20.476143 |
| H | 18.949133 | 16.679254 | 20.474328 |
| H | 19.973801 | 18.472975 | 19.107520 |
| H | 17.369163 | 21.696294 | 19.375281 |
| H | 23.602004 | 23.237323 | 17.898177 |
| H | 24.377781 | 25.475416 | 17.184862 |
| H | 26.806819 | 25.940319 | 16.967612 |
| H | 28.460330 | 24.159371 | 17.471492 |
| H | 27.686176 | 21.916214 | 18.186078 |
| H | 28.253820 | 19.509552 | 17.830985 |
| H | 29.286732 | 17.615348 | 19.051476 |
| H | 28.099494 | 15.437077 | 19.195849 |

|   |           |           |           |
|---|-----------|-----------|-----------|
| H | 25.861168 | 15.173541 | 18.154278 |
| H | 24.813577 | 17.079354 | 16.965700 |
| H | 19.271720 | 24.437504 | 17.622514 |
| H | 18.263763 | 25.904117 | 15.896731 |
| H | 15.933804 | 25.507840 | 15.136523 |
| H | 14.611723 | 23.645400 | 16.107677 |
| H | 15.618878 | 22.178989 | 17.833732 |
